# Supplementary material
Source: publisher site journal article supplement (https://www.dovepress.com/article/446006)
Supplement: Supplementary file 1 [file get_supplementary_file.php]

| **Validation Items** | |
| --- | --- |
| <Droplet Prevention> | |
| 1 | I cover my nose and mouth with a tissue, handkerchief, sleeves etc. when coughing or sneezing. |
| 2 | I discard the used tissue immediately after coughing or sneezing. |
| 3 | I try to turn my head away from others when coughing or sneezing. |
| 4 | I prepare a mask when going out. |
| 5 | I wear a mask when going out in public places. |
| 6 | I wear a mask when I have respiratory symptoms. |
| 7 | I cover my nose, mouth, and chin completely when wearing a mask. |
| 8 | I do not reuse the masks that have been used once. |
| <Contact Prevention> | |
| 9 | I try not to have physical contacts such as shaking hands or hugging others. |
| 10 | I try not to touch my eyes, nose, and mouth with unwashed hands. |
| 11 | I do not touch things right after they were touched by others. |
| 12 | I try to use personal tablewares when having meals with others. |
| 13 | I try to take a shower after returning home. |
| 14 | I try to wash the contaminated laundry after returning home. |
| 15 | I avoid going to crowded places. |
| 16 | I refrain from participating social gatherings. |
| 17 | I try to refrain from eating out. |
| 18 | I try to refrain from traveling within the country or abroad. |
| 19 | I stay home when I have symptoms(fever, cough, rash etc). |
| 20 | I would be cautious not to have close contact with others who have symptoms. |
| 21 | I would be cautious not to visit the affected areas. |
| 22 | I wash my hands with water and soap when my hands are contaminated. |
| 23 | I cleam my hands(washing hands, using sanitizer) after coughing, sneezing, or nose-blowing. |
| 24 | I clean my hands(washing hands, using sanitizer) before having a meal. |
| 25 | I wash my hands with water and soap after using restroom. |
| 26 | I clean my hands(washing hands, using sanitizer) first, right after entering home. |
| 27 | I clean my hands using hand sanitizer when I am not able to wash my hands with water and soap. |
| 28 | I wear protective gloves when there is a risk of contact transmission. |
| <Airborne Prevention> | |
| 29 | I ventilate my home regulary. |
| 30 | I ventilate confined spaces regularly. |
| 31 | I would be cautious not to enter a place where it is not equipped with ventilation. |
| 32 | I leave the place as soon as possible when it is judged hard to be ventilated. |
| 33 | I use air cleaner/air sterlizer/air purifier to maintain the quality of the indoor air. |

Table 1. Supplementary 1. Validation Items

| **Validation Items** | |
| --- | --- |
| <Bloodborne Prevention> | |
| 35 | I wear long sleeves when going out to the forest or mountain. |
| 36 | I use mosquito repellent when going out to a place where there is a risk of pest or mosquito bites. |
| 37 | I open the window only when the mosquito protective screens are installed. |
| 38 | I try to control the pest using the bug catcher (including electronic) /household pest control. etc. |
| 39 | I wash in running water when exposed to other's blood. |
| 40 | I try not to be infected when using injection needle(self-injection, blood transfusion, blood donation, blood draw etc.) |
| 41 | I try to use condom for a safe sexual life. |
| <Environmental Prevention> | |
| 42 | I clean my house regularly. |
| 43 | I use disinfectants to maintain the hygiene of my home. |
| 44 | I clean or disinfect objects or surfaces that are frequently touched. |
| 45 | I would be cautious not to pollute the environment with an animal excrement. |
| 33 | I use air cleaner/air sterlizer/air purifier to maintain the quality of the indoor air. |
| 34 | I would be cautious controlling temperature and humidity of the indoor. |
| <Daily life Prevention> | |
| 46 | I try not to eat raw food(except vegetables and fruits). |
| 47 | I drink boiled water or bottled water. |
| 48 | I try to have a balanced diet. |
| 49 | I excersise regularly. |
| 50 | I try to take a rest. |
| 51 | I avoid going out on days with heavy fine dust. |
| 52 | I take health supplement(viatamins, protein etc.) for immunity enhancement. |
| 53 | I get medical check-ups regularly. |
| 54 | I try to get vaccinated against the Emerging Infectious Diseases. |
| 55 | I check my body temperature with a thermometer when I have fever symptoms. |
| <Psychological Coping> | |
| 56 | I try to have a positive mind. |
| 57 | I try to have an attitude of acceptance. |
| 58 | I try to cope with the Emerging Infectious Diseases. |
| 59 | I try to be considerate of others to prevent others from getting infected. |
| 60 | I try to maintain relationship with others through communications. |
| 61 | I try to get information about Emerging Infectious Diseases. |
| 62 | I try to comply the preventing behaviors when I acquire information regarding Emerging Infectious Diseases. |
| 63 | I comply preventive behaviors with a confidence in medical staff. |
| 64 | I have confidence in the government’s quarantine policy. |


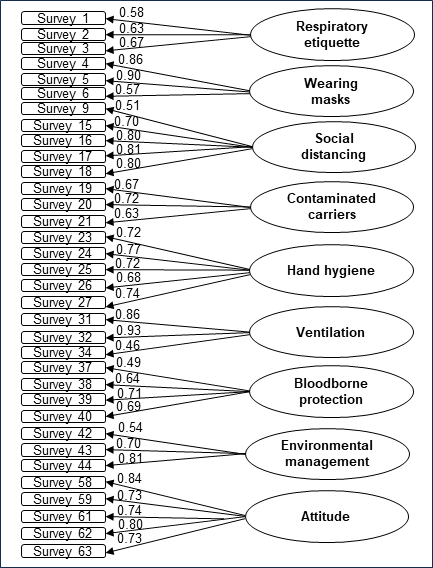
 **Supplementary 2. Standardized coefficient of the nine-factor model**


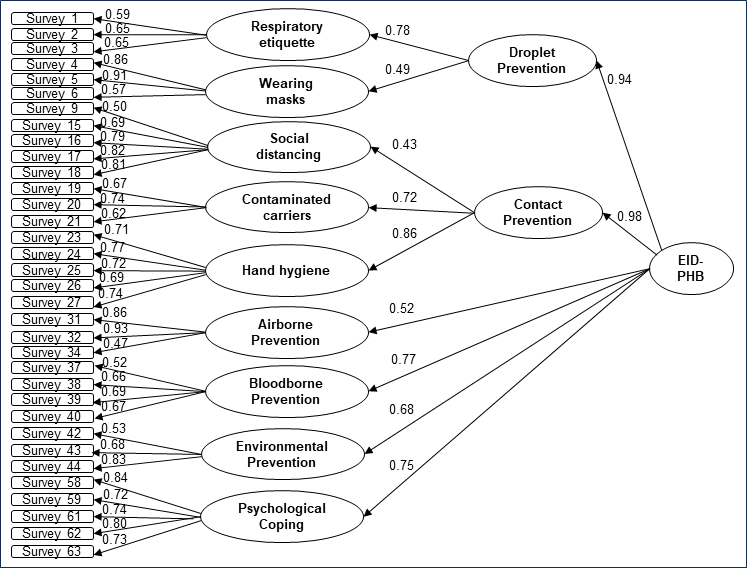
 **Supplementary 3. Standardized coefficient of the six-factor model**

**Abbreviations:** EID-PHB= Emerging Infectious Diseases Preventive Health Behavior.


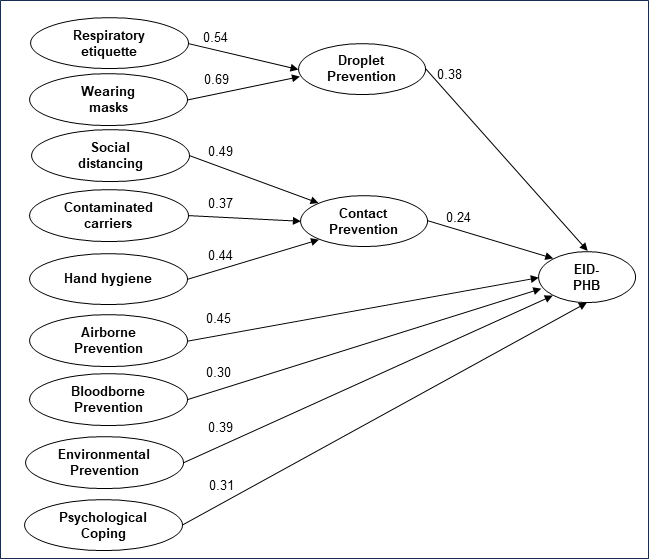
 **Supplementary 4. Standardized coefficient of the Preventive Health Behaviors**

**Abbreviations:** EID-PHB= Emerging Infectious Diseases Preventive Health Behavior.

Supplementary 5. Exploratory Factor Analysis of Daily Life Prevention

| **Factor** | **No** | **Items** | **Com.** | **F** | **CR** | **AVE** | **α＊** | **Cor. (r)**  **<*p*>** |
| --- | --- | --- | --- | --- | --- | --- | --- | --- |
| Factor 7 Daily life prevention | | | | | 0.82 | 0.61 | 0.67 | 0.35~0.45 <0.001> |
| Health care | 49 | I excersise regularly. | 0.64 | 0.80 |  |  |  |  |
| 48 | I try to have a balanced diet. | 0.63 | 0.79 |  |  |  |  |
| 53 | I get medical check-ups regularly. | 0.55 | 0.74 |  |  |  |  |
| Eigen value | | | 1.8 |  |  |  |  |  |
| Explained variance (%) | | | 60.7 |  |  |  |  |  |
| Cumulative variance (%) | | | 60.7 |  |  |  |  |  |
| Kaiser-Meyer-Olkin: 0.66, Bartlett’s test of sphericity: χ²=152.49 (*p <* 0.001) | | | | | | | | |

**Abbreviations:** Com.= Communality; F= Factor loading; CR= Construct Reliability; AVE= Average Variance Extracted;

α＊= Cronbach's α; Cor.= Correlation coefficienct.
